# Supplementary material for: Gold peroxide complexes and the conversion of hydroperoxides into gold hydrides by successive oxygen-transfer reactions
Source: Springer Nature journal article supplement (doi:10.1038/ncomms3167), 2013-07-15
Supplement: 41467_2013_BFncomms3167_MOESM3_ESM.mol [file 41467_2013_BFncomms3167_MOESM3_ESM.mol]

  ChemDraw07181307332D

 29 29  0  0  0  0  0  0  0  0999 V2000
    2.8579    0.2654    0.0000 C   0  0  0  0  0  0  0  0  0  0  0  0
    2.8579   -0.5596    0.0000 C   0  0  0  0  0  0  0  0  0  0  0  0
    2.1434   -0.9721    0.0000 C   0  0  0  0  0  0  0  0  0  0  0  0
    1.4289   -0.5596    0.0000 C   0  5  0  0  0  0  0  0  0  0  0  0
    1.4289    0.2654    0.0000 C   0  0  0  0  0  0  0  0  0  0  0  0
    2.1434    0.6779    0.0000 C   0  0  0  0  0  0  0  0  0  0  0  0
    0.7145    0.7476    0.0000 C   0  0  0  0  0  0  0  0  0  0  0  0
   -0.0000    0.3351    0.0000 N   0  0  0  0  0  0  0  0  0  0  0  0
   -0.7145    0.7476    0.0000 C   0  0  0  0  0  0  0  0  0  0  0  0
   -0.7145    1.5726    0.0000 C   0  0  0  0  0  0  0  0  0  0  0  0
   -0.0000    1.9851    0.0000 C   0  0  0  0  0  0  0  0  0  0  0  0
    0.7145    1.5726    0.0000 C   0  0  0  0  0  0  0  0  0  0  0  0
   -1.4289    0.2654    0.0000 C   0  0  0  0  0  0  0  0  0  0  0  0
   -1.4289   -0.5596    0.0000 C   0  5  0  0  0  0  0  0  0  0  0  0
   -2.1434   -0.9721    0.0000 C   0  0  0  0  0  0  0  0  0  0  0  0
   -2.8579   -0.5596    0.0000 C   0  0  0  0  0  0  0  0  0  0  0  0
   -2.8579    0.2654    0.0000 C   0  0  0  0  0  0  0  0  0  0  0  0
   -2.1434    0.6779    0.0000 C   0  0  0  0  0  0  0  0  0  0  0  0
    3.5724   -0.9721    0.0000 C   0  0  0  0  0  0  0  0  0  0  0  0
   -3.5724   -0.9721    0.0000 C   0  0  0  0  0  0  0  0  0  0  0  0
   -4.2844   -0.5610    0.0000 C   0  0  0  0  0  0  0  0  0  0  0  0
    4.2844   -0.5610    0.0000 C   0  0  0  0  0  0  0  0  0  0  0  0
    3.1599   -1.6865    0.0000 C   0  0  0  0  0  0  0  0  0  0  0  0
    3.9849   -1.6865    0.0000 C   0  0  0  0  0  0  0  0  0  0  0  0
   -3.9849   -1.6865    0.0000 C   0  0  0  0  0  0  0  0  0  0  0  0
   -3.1599   -1.6865    0.0000 C   0  0  0  0  0  0  0  0  0  0  0  0
   -0.0052   -1.9851    0.0000 O   2  5  0  0  0  0  0  0  0  0  0  0
    0.8442   -1.9851    0.0000 H   0  0  0  0  0  0  0  0  0  0  0  0
   -0.0016   -0.8496    0.0000 Au  0  1  0  0  0  0  0  0  0  0  0  0
  1  2  2  0      
  2  3  1  0      
  3  4  2  0      
  4  5  1  0      
  5  6  2  0      
  6  1  1  0      
  5  7  1  0      
  7  8  2  0      
  8  9  1  0      
  9 10  2  0      
 10 11  1  0      
 11 12  2  0      
 12  7  1  0      
  9 13  1  0      
 13 14  2  0      
 14 15  1  0      
 15 16  2  0      
 16 17  1  0      
 17 18  2  0      
 18 13  1  0      
  2 19  1  0      
 16 20  1  0      
 20 21  1  0      
 19 22  1  0      
 19 23  1  0      
 19 24  1  0      
 20 25  1  0      
 20 26  1  0      
 27 28  1  0      
M  ISO  1  27  18
M  CHG  4   4  -1  14  -1  27  -1  29   3
M  END
