# Supplementary material for: Gold peroxide complexes and the conversion of hydroperoxides into gold hydrides by successive oxygen-transfer reactions
Source: Springer Nature journal article supplement (doi:10.1038/ncomms3167), 2013-07-15
Supplement: 41467_2013_BFncomms3167_MOESM5_ESM.mol [file 41467_2013_BFncomms3167_MOESM5_ESM.mol]

  ChemDraw07181307332D

 33 33  0  0  0  0  0  0  0  0999 V2000
    2.8579    1.2459    0.0000 C   0  0  0  0  0  0  0  0  0  0  0  0
    2.8579    0.4209    0.0000 C   0  0  0  0  0  0  0  0  0  0  0  0
    2.1434    0.0084    0.0000 C   0  0  0  0  0  0  0  0  0  0  0  0
    1.4289    0.4209    0.0000 C   0  5  0  0  0  0  0  0  0  0  0  0
    1.4289    1.2459    0.0000 C   0  0  0  0  0  0  0  0  0  0  0  0
    2.1434    1.6584    0.0000 C   0  0  0  0  0  0  0  0  0  0  0  0
    0.7145    1.7280    0.0000 C   0  0  0  0  0  0  0  0  0  0  0  0
   -0.0000    1.3155    0.0000 N   0  0  0  0  0  0  0  0  0  0  0  0
   -0.7145    1.7280    0.0000 C   0  0  0  0  0  0  0  0  0  0  0  0
   -0.7145    2.5530    0.0000 C   0  0  0  0  0  0  0  0  0  0  0  0
   -0.0000    2.9655    0.0000 C   0  0  0  0  0  0  0  0  0  0  0  0
    0.7145    2.5530    0.0000 C   0  0  0  0  0  0  0  0  0  0  0  0
   -1.4289    1.2459    0.0000 C   0  0  0  0  0  0  0  0  0  0  0  0
   -1.4289    0.4209    0.0000 C   0  5  0  0  0  0  0  0  0  0  0  0
   -2.1434    0.0084    0.0000 C   0  0  0  0  0  0  0  0  0  0  0  0
   -2.8579    0.4209    0.0000 C   0  0  0  0  0  0  0  0  0  0  0  0
   -2.8579    1.2459    0.0000 C   0  0  0  0  0  0  0  0  0  0  0  0
   -2.1434    1.6584    0.0000 C   0  0  0  0  0  0  0  0  0  0  0  0
    3.5724    0.0084    0.0000 C   0  0  0  0  0  0  0  0  0  0  0  0
   -3.5724    0.0084    0.0000 C   0  0  0  0  0  0  0  0  0  0  0  0
    4.2844    0.4195    0.0000 C   0  0  0  0  0  0  0  0  0  0  0  0
    3.1599   -0.7061    0.0000 C   0  0  0  0  0  0  0  0  0  0  0  0
    3.9849   -0.7061    0.0000 C   0  0  0  0  0  0  0  0  0  0  0  0
   -4.2844    0.4195    0.0000 C   0  0  0  0  0  0  0  0  0  0  0  0
   -3.9849   -0.7061    0.0000 C   0  0  0  0  0  0  0  0  0  0  0  0
   -3.1599   -0.7061    0.0000 C   0  0  0  0  0  0  0  0  0  0  0  0
   -0.0016    0.1308    0.0000 Au  0  1  0  0  0  0  0  0  0  0  0  0
   -0.0052   -1.0046    0.0000 O   0  5  0  0  0  0  0  0  0  0  0  0
    0.5782   -1.5880    0.0000 O   0  0  0  0  0  0  0  0  0  0  0  0
    0.3654   -2.3822    0.0000 C   0  0  0  0  0  0  0  0  0  0  0  0
    0.9468   -2.9636    0.0000 C   0  0  0  0  0  0  0  0  0  0  0  0
   -0.4596   -2.3822    0.0000 C   0  0  0  0  0  0  0  0  0  0  0  0
   -0.2180   -2.9655    0.0000 C   0  0  0  0  0  0  0  0  0  0  0  0
  1  2  2  0      
  2  3  1  0      
  3  4  2  0      
  4  5  1  0      
  5  6  2  0      
  6  1  1  0      
  5  7  1  0      
  7  8  2  0      
  8  9  1  0      
  9 10  2  0      
 10 11  1  0      
 11 12  2  0      
 12  7  1  0      
  9 13  1  0      
 13 14  2  0      
 14 15  1  0      
 15 16  2  0      
 16 17  1  0      
 17 18  2  0      
 18 13  1  0      
  2 19  1  0      
 16 20  1  0      
 19 21  1  0      
 19 22  1  0      
 19 23  1  0      
 20 24  1  0      
 20 25  1  0      
 20 26  1  0      
 28 29  1  0      
 29 30  1  0      
 30 31  1  0      
 30 32  1  0      
 30 33  1  0      
M  CHG  4   4  -1  14  -1  27   3  28  -1
M  END
