# Supplementary material for: Gold peroxide complexes and the conversion of hydroperoxides into gold hydrides by successive oxygen-transfer reactions
Source: Springer Nature journal article supplement (doi:10.1038/ncomms3167), 2013-07-15
Supplement: 41467_2013_BFncomms3167_MOESM11_ESM.mol [file 41467_2013_BFncomms3167_MOESM11_ESM.mol]

  ChemDraw07181307332D

 55 56  0  0  0  0  0  0  0  0999 V2000
   -2.4311   -2.8567    0.0000 C   0  0  0  0  0  0  0  0  0  0  0  0
   -1.6061   -2.8567    0.0000 C   0  0  0  0  0  0  0  0  0  0  0  0
   -1.1936   -2.1422    0.0000 C   0  0  0  0  0  0  0  0  0  0  0  0
   -1.6061   -1.4277    0.0000 C   0  5  0  0  0  0  0  0  0  0  0  0
   -2.4311   -1.4277    0.0000 C   0  0  0  0  0  0  0  0  0  0  0  0
   -2.8436   -2.1422    0.0000 C   0  0  0  0  0  0  0  0  0  0  0  0
   -2.9132   -0.7133    0.0000 C   0  0  0  0  0  0  0  0  0  0  0  0
   -2.5007    0.0012    0.0000 N   0  0  0  0  0  0  0  0  0  0  0  0
   -2.9132    0.7157    0.0000 C   0  0  0  0  0  0  0  0  0  0  0  0
   -3.7382    0.7157    0.0000 C   0  0  0  0  0  0  0  0  0  0  0  0
   -4.1507    0.0012    0.0000 C   0  0  0  0  0  0  0  0  0  0  0  0
   -3.7382   -0.7133    0.0000 C   0  0  0  0  0  0  0  0  0  0  0  0
   -2.4311    1.4301    0.0000 C   0  0  0  0  0  0  0  0  0  0  0  0
   -1.6061    1.4301    0.0000 C   0  5  0  0  0  0  0  0  0  0  0  0
   -1.1936    2.1446    0.0000 C   0  0  0  0  0  0  0  0  0  0  0  0
   -1.6061    2.8591    0.0000 C   0  0  0  0  0  0  0  0  0  0  0  0
   -2.4311    2.8591    0.0000 C   0  0  0  0  0  0  0  0  0  0  0  0
   -2.8436    2.1446    0.0000 C   0  0  0  0  0  0  0  0  0  0  0  0
   -1.1936   -3.5712    0.0000 C   0  0  0  0  0  0  0  0  0  0  0  0
   -1.1936    3.5736    0.0000 C   0  0  0  0  0  0  0  0  0  0  0  0
   -1.6047    4.2856    0.0000 C   0  0  0  0  0  0  0  0  0  0  0  0
   -0.4791    3.1611    0.0000 C   0  0  0  0  0  0  0  0  0  0  0  0
   -0.4791    3.9861    0.0000 C   0  0  0  0  0  0  0  0  0  0  0  0
   -1.6061   -4.2856    0.0000 C   0  0  0  0  0  0  0  0  0  0  0  0
   -0.4791   -3.1587    0.0000 C   0  0  0  0  0  0  0  0  0  0  0  0
   -0.4791   -3.9837    0.0000 C   0  0  0  0  0  0  0  0  0  0  0  0
   -0.0308    0.0049    0.0000 O   0  6  0  0  0  0  0  0  0  0  0  0
   -1.3160    0.0028    0.0000 Au  0  1  0  0  0  0  0  0  0  0  0  0
    2.4311   -2.8567    0.0000 C   0  0  0  0  0  0  0  0  0  0  0  0
    1.6061   -2.8567    0.0000 C   0  0  0  0  0  0  0  0  0  0  0  0
    1.1936   -2.1422    0.0000 C   0  0  0  0  0  0  0  0  0  0  0  0
    1.6061   -1.4277    0.0000 C   0  5  0  0  0  0  0  0  0  0  0  0
    2.4311   -1.4277    0.0000 C   0  0  0  0  0  0  0  0  0  0  0  0
    2.8436   -2.1422    0.0000 C   0  0  0  0  0  0  0  0  0  0  0  0
    2.9132   -0.7133    0.0000 C   0  0  0  0  0  0  0  0  0  0  0  0
    2.5007    0.0012    0.0000 N   0  0  0  0  0  0  0  0  0  0  0  0
    2.9132    0.7157    0.0000 C   0  0  0  0  0  0  0  0  0  0  0  0
    3.7382    0.7157    0.0000 C   0  0  0  0  0  0  0  0  0  0  0  0
    4.1507    0.0012    0.0000 C   0  0  0  0  0  0  0  0  0  0  0  0
    3.7382   -0.7133    0.0000 C   0  0  0  0  0  0  0  0  0  0  0  0
    2.4311    1.4301    0.0000 C   0  0  0  0  0  0  0  0  0  0  0  0
    1.6061    1.4301    0.0000 C   0  5  0  0  0  0  0  0  0  0  0  0
    1.1936    2.1446    0.0000 C   0  0  0  0  0  0  0  0  0  0  0  0
    1.6061    2.8591    0.0000 C   0  0  0  0  0  0  0  0  0  0  0  0
    2.4311    2.8591    0.0000 C   0  0  0  0  0  0  0  0  0  0  0  0
    2.8436    2.1446    0.0000 C   0  0  0  0  0  0  0  0  0  0  0  0
    1.1936   -3.5712    0.0000 C   0  0  0  0  0  0  0  0  0  0  0  0
    1.1936    3.5736    0.0000 C   0  0  0  0  0  0  0  0  0  0  0  0
    1.6047    4.2856    0.0000 C   0  0  0  0  0  0  0  0  0  0  0  0
    0.4791    3.9861    0.0000 C   0  0  0  0  0  0  0  0  0  0  0  0
    0.4791    3.1611    0.0000 C   0  0  0  0  0  0  0  0  0  0  0  0
    1.6047   -4.2832    0.0000 C   0  0  0  0  0  0  0  0  0  0  0  0
    0.4791   -3.1587    0.0000 C   0  0  0  0  0  0  0  0  0  0  0  0
    0.4791   -3.9837    0.0000 C   0  0  0  0  0  0  0  0  0  0  0  0
    1.3160    0.0028    0.0000 Au  0  1  0  0  0  0  0  0  0  0  0  0
  1  2  2  0      
  2  3  1  0      
  3  4  2  0      
  4  5  1  0      
  5  6  2  0      
  6  1  1  0      
  5  7  1  0      
  7  8  2  0      
  8  9  1  0      
  9 10  2  0      
 10 11  1  0      
 11 12  2  0      
 12  7  1  0      
  9 13  1  0      
 13 14  2  0      
 14 15  1  0      
 15 16  2  0      
 16 17  1  0      
 17 18  2  0      
 18 13  1  0      
  2 19  1  0      
 16 20  1  0      
 20 21  1  0      
 20 22  1  0      
 20 23  1  0      
 19 24  1  0      
 19 25  1  0      
 19 26  1  0      
 29 30  2  0      
 30 31  1  0      
 31 32  2  0      
 32 33  1  0      
 33 34  2  0      
 34 29  1  0      
 33 35  1  0      
 35 36  2  0      
 36 37  1  0      
 37 38  2  0      
 38 39  1  0      
 39 40  2  0      
 40 35  1  0      
 37 41  1  0      
 41 42  2  0      
 42 43  1  0      
 43 44  2  0      
 44 45  1  0      
 45 46  2  0      
 46 41  1  0      
 30 47  1  0      
 44 48  1  0      
 48 49  1  0      
 48 50  1  0      
 48 51  1  0      
 47 52  1  0      
 47 53  1  0      
 47 54  1  0      
M  CHG  7   4  -1  14  -1  27  -2  28   3  32  -1  42  -1  55   3
M  END
